# Supplementary material for: Turmeric extract (Curcuma longa L.) regulates hepatic toxicity in a single ethanol binge rat model
Source: PubMed Central journal article supplement (PMC9526153; doi:10.1016/j.heliyon.2022.e10737), 2022-09-22

**Supplementary Figure 1. Ethanol-induced CYP2E1 activity and oxidative stress is suppressed by turmeric extract. (Figure 4a)**

**Figure 4a**

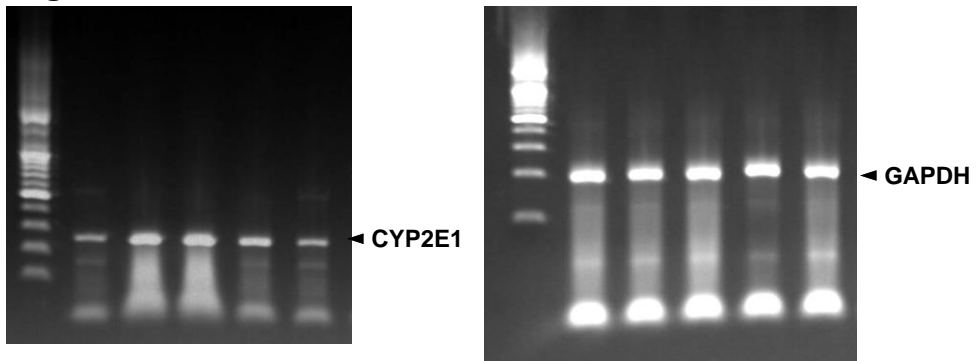

**Supplementary Figure 2. Influence of turmeric extract on the activity of antioxidant enzymes in alcohol-induced SD rats. (Figure 6a, Figure 6b, and Figure 6c)**

**Figure 6a**

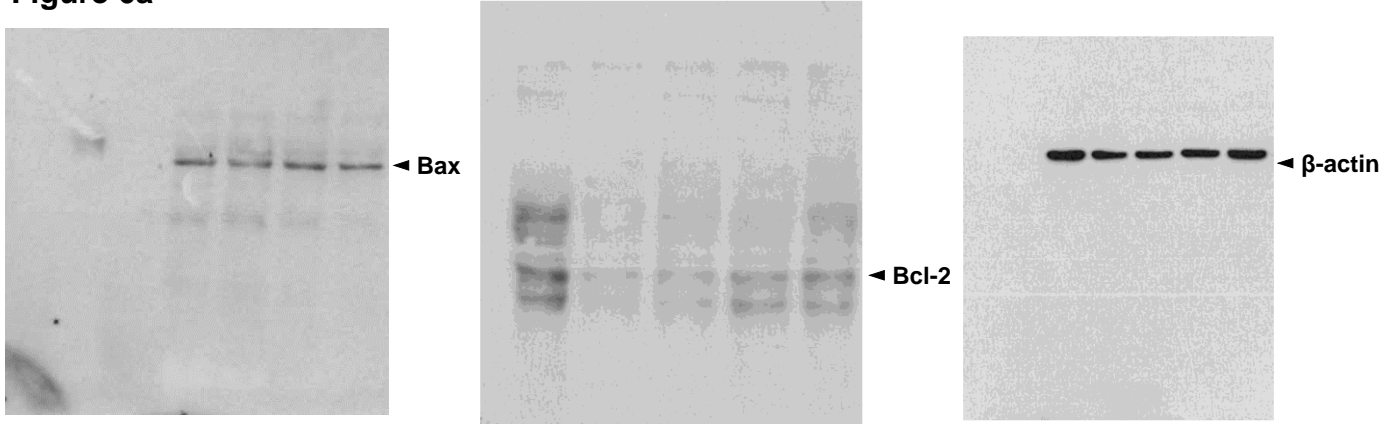

**Figure 6b**

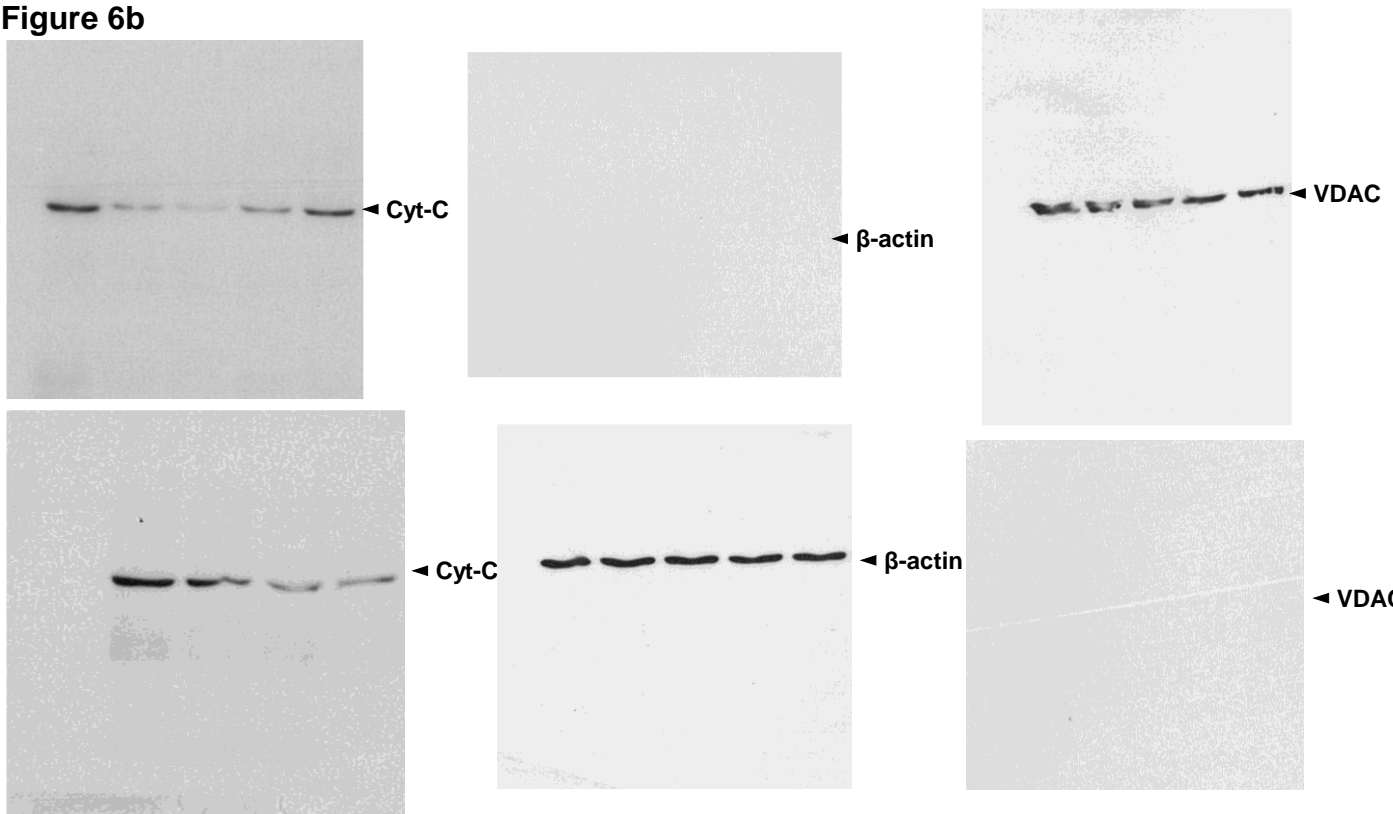

**Figure 6c**

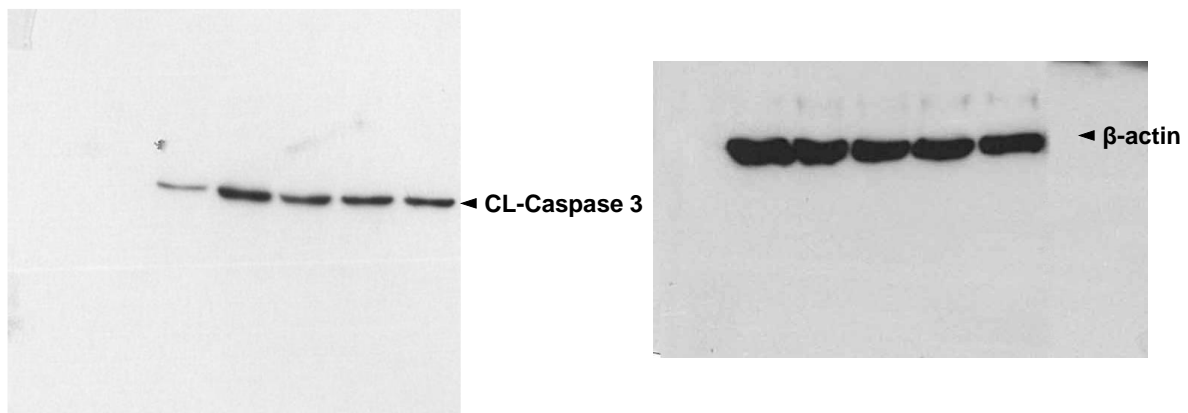

Supplement: mmc1.pdf [file mmc1.pdf]
